# Supplementary material
Source: Springer Nature journal article supplement (https://www.springermedizin.de/resource/supplementary/12886_2010_260_MOESM1_ESM.pdf/9473676)

Nasal

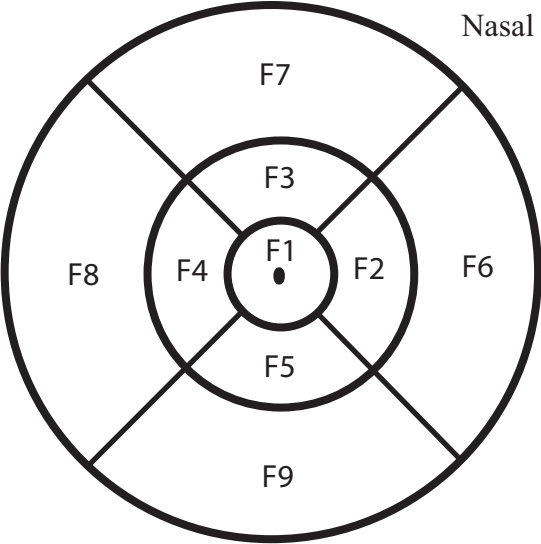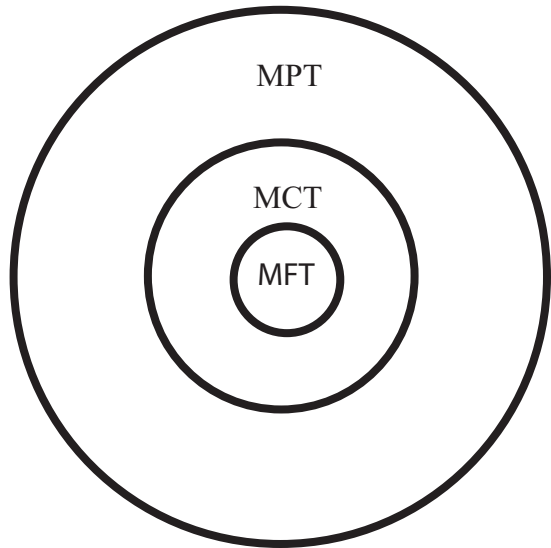

Supplement: MOESM1 [file 9473676]
